# Supplementary material
Source: MDPI journal article supplement (https://www.mdpi.com/2673-4532/3/2/12)
Supplement: s1 [file s1]

# Development and Validation of an HPLC Method for the Determination of Meloxicam and Pantoprazole in a Combined Formulation

Raneem Ahmad <sup>1,†</sup>, Mohammad Hailat <sup>2,†</sup>, Zainab Zakaraya <sup>3</sup>, Osaid Al Meanazel <sup>4</sup> and Wael Abu Dayyih <sup>5,\*</sup>

<sup>1</sup> Faculty of Pharmacy and Medical Sciences, University of Petra, Amman 1196, Jordan; raneem.ahmadd@outlook.com

<sup>2</sup> Faculty of Pharmacy, Al-Zaytoonah University of Jordan, Amman 11733, Jordan; m.hailat@zuj.edu.jo

<sup>3</sup> Faculty of Pharmacy, Al-Ahliyya Amman University, Amman 19328, Jordan; z.zakaraya@ammanu.edu.jo

<sup>4</sup> Michael Sayegh Faculty of Pharmacy, Aqaba University of Technology, Aqaba 77110, Jordan; otalmeanazel@aut.edu.jo

<sup>5</sup> Faculty of Pharmacy, Mutah University, Al-Karak 61710, Jordan

\* Correspondence: wabudayyih@mutah.edu.jo

† Equal contributions.

## 1. Compatibility Tests

The compatibility of meloxicam and pantoprazole was checked; the samples were analyzed on Fourier Transform Infrared (FTIR) and Differential Scanning Calorimeter (DSC) devices for this purpose.

FTIR is an essential analytical technique for determining compatibility. The analysis is based on the exact functional group change during the interaction between the drug and the drug excipients.

On the other hand, DSC is a thermal analysis device that measures physical properties and temperature change over time.

All of the excipients used in the formula were compatible with both drugs in IR and DSC studies.

## 2. Dissolution Test

According to the US Pharmacopeia, the following procedures were done during the experiment. A 1000 mL of dissolution media was placed in a dissolution vessel. Next, one tablet was introduced into the vessel of the dissolution apparatus, taking care to exclude air bubbles from the tablet's surface.

Immediately operate the apparatus at 50 rpm. The vessel was kept covered for the test duration and verified the mixture's temperature under test at the beginning, mid, and end.

After 30 minutes, 10 mL was withdrawn from a region midway between the surface of the dissolution medium and the top of the rotating paddle, not less than 1 cm from the vessel wall, and filtered through a 0.7- $\mu$ m glass syringe filter.

The operating conditions were: the medium: HCl; 1000 mL, speed: 50 rpm, time: 30 minutes, apparatus: II, and filter type: 0.7  $\mu$ m glass filter.

Table 1A. Assay test details of meloxicam.

| Sample ID | AUC | Conc actual ppm (mg/L) | Conc theoretical ppm (mg/L) | Av. | ASSAY % | Assay B# | RSD% |
|-----------|-----|------------------------|-----------------------------|-----|---------|----------|------|
|-----------|-----|------------------------|-----------------------------|-----|---------|----------|------|

|                                                           |         |       |       |       |     |       |     |
|-----------------------------------------------------------|---------|-------|-------|-------|-----|-------|-----|
| Pantoprazole (10mg)<br>Meloxicam (15) mg Sample<br>1 Rep1 | 1892959 | 147.8 |       |       | 99  |       |     |
| Pantoprazole (10mg)<br>Meloxicam (15) mg Sample<br>1 Rep2 | 1957959 | 152.9 | 150.0 | 151.8 | 102 | 101.2 |     |
| Pantoprazole (10mg)<br>Meloxicam (15) mg Sample<br>1 Rep3 | 1982207 | 154.7 |       |       | 103 |       |     |
| Pantoprazole (10mg)<br>Meloxicam (15) mg Sample<br>2 Rep1 | 1921804 | 150.0 |       |       | 100 |       |     |
| Pantoprazole (10mg)<br>Meloxicam (15) mg Sample<br>2 Rep2 | 1937167 | 151.2 | 150.0 | 152.7 | 101 | 101.8 | 101 |
| Pantoprazole (10mg)<br>Meloxicam (15) mg Sample<br>2 Rep3 | 2010235 | 156.9 |       |       | 105 |       |     |
| Pantoprazole (10mg)<br>Meloxicam (15) mg Sample<br>3 Rep1 | 1939649 | 151.4 |       |       | 101 |       | 1   |
| Pantoprazole (10mg)<br>Meloxicam (15) mg Sample<br>3 Rep2 | 1923402 | 150.1 | 150.0 | 150.4 |     | 100.2 |     |
| Pantoprazole (10mg)<br>Meloxicam (15) mg Sample<br>3 Rep3 | 1915415 | 149.5 |       |       | 100 |       |     |

**Table 1B.** Assay test details of pantoprazole.

| Sample ID                                                 | AUC     | Conc.<br>actual<br>ppm<br>(mg/L) | Conc<br>theoretical<br>ppm (mg/L) | Av.   | ASSAY % | Assay B# | RSD% |
|-----------------------------------------------------------|---------|----------------------------------|-----------------------------------|-------|---------|----------|------|
| Pantoprazole (10mg)<br>Meloxicam (15) mg Sample<br>1 Rep1 | 2506851 | 96.7                             |                                   |       | 97      |          |      |
| Pantoprazole (10mg)<br>Meloxicam (15) mg Sample<br>1 Rep2 | 2645242 | 102.1                            | 100.0                             | 99.1  | 102     | 99.1     |      |
| Pantoprazole (10mg)<br>Meloxicam (15) mg Sample<br>1 Rep3 | 2554882 | 98.6                             |                                   |       | 99      |          | 101  |
| Pantoprazole (10mg)<br>Meloxicam (15) mg Sample<br>2 Rep1 | 2654845 | 102.5                            |                                   |       | 102     |          |      |
| Pantoprazole (10mg)<br>Meloxicam (15) mg Sample<br>2 Rep2 | 2605418 | 100.6                            | 100.0                             | 101.4 | 101     | 101.4    | 2    |

|                                                           |         |       |       |       |     |       |
|-----------------------------------------------------------|---------|-------|-------|-------|-----|-------|
| Pantoprazole (10mg)<br>Meloxicam (15) mg Sample<br>2 Rep3 | 2618783 | 101.1 |       |       | 101 |       |
| Pantoprazole (10mg)<br>Meloxicam (15) mg Sample<br>3 Rep1 | 2687895 | 103.7 |       |       | 104 |       |
| Pantoprazole (10mg)<br>Meloxicam (15) mg Sample<br>3 Rep2 | 2597561 | 100.2 | 100.0 | 102.1 |     | 102.1 |
| Pantoprazole (10mg)<br>Meloxicam (15) mg Sample<br>3 Rep3 | 2648562 | 102.2 |       |       | 100 |       |

**Table 2A.** Dissolution of meloxicam.

| Sample ID      | Area   | Conc.<br>Actual<br>ppm(mg/l) | Conc. Theoretical<br>ppm(mg/l) | Accuracy | Av.    | RSD% |
|----------------|--------|------------------------------|--------------------------------|----------|--------|------|
| Dissolution V1 | 198456 | 15.2                         | 15.0                           | 102      | 100.09 | 0.01 |
| Dissolution V2 | 199546 | 15.3                         | 15.0                           | 102      |        |      |
| Dissolution V3 | 194756 | 15.0                         | 15.0                           | 100      |        |      |
| Dissolution V4 | 193564 | 14.9                         | 15.0                           | 99       |        |      |
| Dissolution V5 | 193564 | 14.9                         | 15.0                           | 99       |        |      |
| Dissolution V6 | 193413 | 14.8                         | 15.0                           | 99       |        |      |

**Table 2B.** Dissolution of Pantoprazole.

| Sample ID      | Area   | Conc.<br>Actual<br>ppm(mg/l) | Conc.<br>Theoretical<br>ppm(mg/l) | Accuracy | Av.    | RSD% |
|----------------|--------|------------------------------|-----------------------------------|----------|--------|------|
| Dissolution V1 | 274566 | 10.3                         | 10.0                              | 103      | 102.04 | 0.03 |
| Dissolution V2 | 270155 | 10.1                         | 10.0                              | 101      |        |      |
| Dissolution V3 | 268745 | 10.1                         | 10.0                              | 101      |        |      |
| Dissolution V4 | 261548 | 9.8                          | 10.0                              | 98       |        |      |
| Dissolution V5 | 268954 | 10.1                         | 10.0                              | 101      |        |      |
| Dissolution V6 | 287565 | 10.8                         | 10.0                              | 108      |        |      |

**Table 3A.** Stability of meloxicam.

| Sample ID                           | AUC     | Conc.<br>Actual<br>ppm(mg/l) | Conc.<br>Theoretical<br>ppm(mg/l) | Av.  | Assay% |
|-------------------------------------|---------|------------------------------|-----------------------------------|------|--------|
| Meloxicam (15) mg Sample1 initial   | 971088  | 75.7                         |                                   |      | 101    |
| Meloxicam (15) mg Sample1<br>12 hr. | 969443  | 75.5                         |                                   |      | 101    |
| Meloxicam (15) mg Sample1<br>24 hr. | 9656587 | 75.2                         | 75.0                              | 75.5 | 100    |

**Table 3B.** Stability of pantoprazole.

---

| Sample ID                             | AUC     | Conc.<br>Actual<br>ppm(mg\l) | Conc.<br>Theoretical<br>ppm(mg\l) | Av.  | Assay% |
|---------------------------------------|---------|------------------------------|-----------------------------------|------|--------|
| Pantoprazole (10mg) Sample1 Initial   | 1277454 | 49.1                         | 50.0                              | 48.8 | 98     |
| Pantoprazole (10mg) Sample1<br>12 hr. | 1272398 | 48.9                         |                                   |      | 98     |
| Pantoprazole (10mg) Sample1<br>24 hr. | 1254686 | 48.3                         |                                   |      | 97     |

---
